# Supplementary material for: Flame retardant and anti-dripping properties of polylactic acid/poly(bis(phenoxy)phosphazene)/expandable graphite composite and its flame retardant mechanism
Source: Royal Society of Chemistry journal article supplement (doi:10.1039/c5ra12701g), 2015-01-01
Supplement: c5ra12701g1.pdf [file c5ra12701g1.pdf]

Electronic Supplementary Information

**Flame retardant and anti-dripping properties of polylactic acid/poly(bis(phenoxy)phosphazene)/expandable graphite composite and its flame retardant mechanism**

Xiaowei Mu, Bihe Yuan, Weizhao Hu, Shuilai Qiu, Lei Song,\* Yuan Hu\*

State Key Laboratory of Fire Science, University of Science and Technology of China,  
Hefei 230026, China

\* Correspondence to: Yuan Hu; Lei Song.

Tel/fax: +86-551-63601664

E-mail: yuanhu@ustc.edu.cn; leisong@ustc.edu.cn

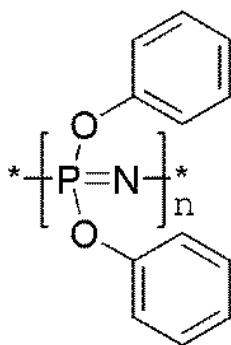

**Fig. S1.** Chemical structure of SPB-100.

In Fig. S2, the absorption peak at  $3418 \text{ cm}^{-1}$  corresponds to O-H vibration adsorption and of  $\text{H}_2\text{O}$ . The absorption peaks at  $2958$ ,  $2924$  and  $2856 \text{ cm}^{-1}$  are assigned to the vibration adsorption of  $-\text{CH}_3$  and  $-\text{CH}_2-$ . The absorption peak at  $1635 \text{ cm}^{-1}$  is ascribed to the vibration adsorption of  $\text{C}=\text{C}$  in graphite material.<sup>1</sup> The absorption peak at  $1005 \text{ cm}^{-1}$  belongs to the vibration adsorption of  $\text{C}-\text{O}-\text{C}$ .<sup>2</sup> The composition of the char residue of neat PLA is graphitic materials with oxygen functional groups. In the FTIR spectrum of char residue of PLA3, the peak at  $1162 \text{ cm}^{-1}$  is stretching vibration of  $\text{PO}_2/\text{PO}_3$  in phosphate carbon complexes.<sup>3,4</sup> The FTIR spectrum of char residue of PLA4 is similar to that of neat PLA.

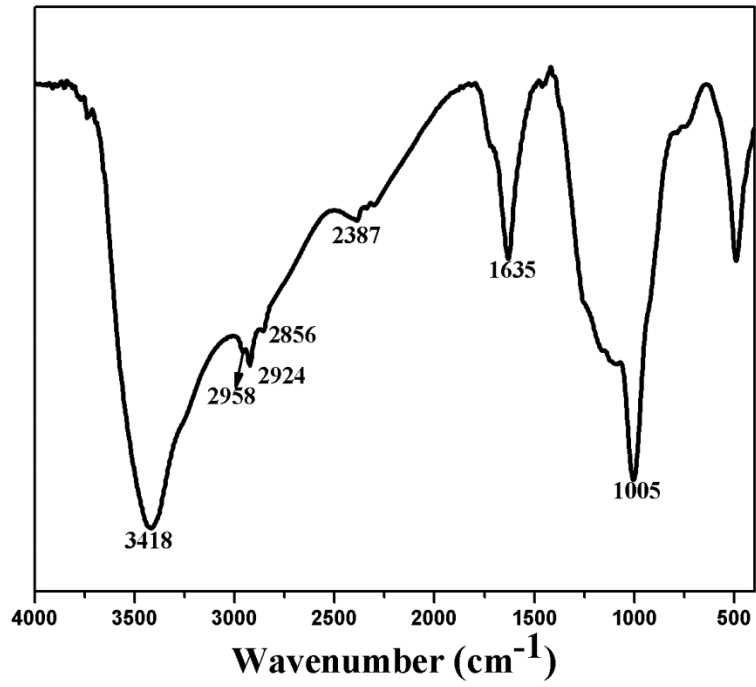

**Fig. S2.** FTIR spectrum of char residue of PLA0 after cone calorimeter test.

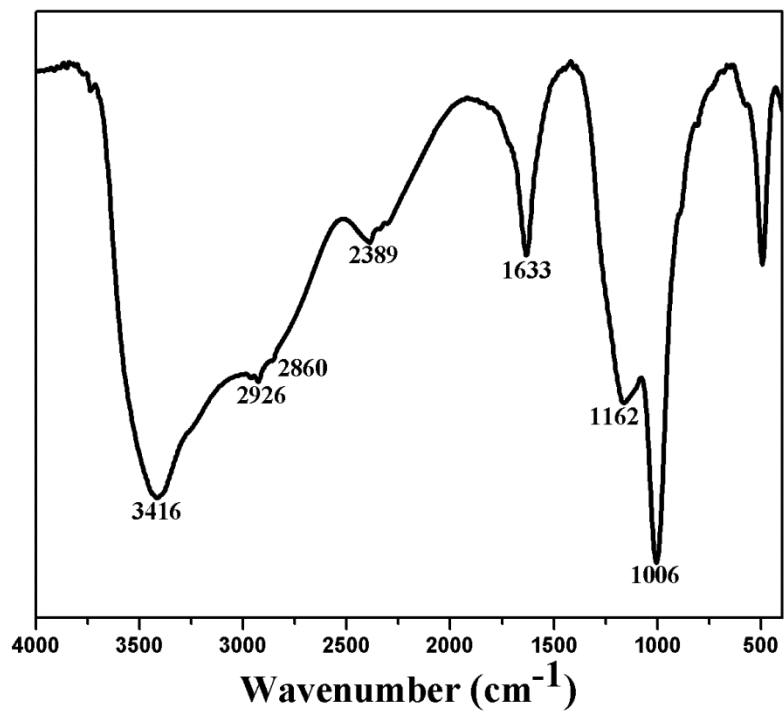

**Fig. S3.** FTIR spectrum of char residue of PLA3 after cone calorimeter test.

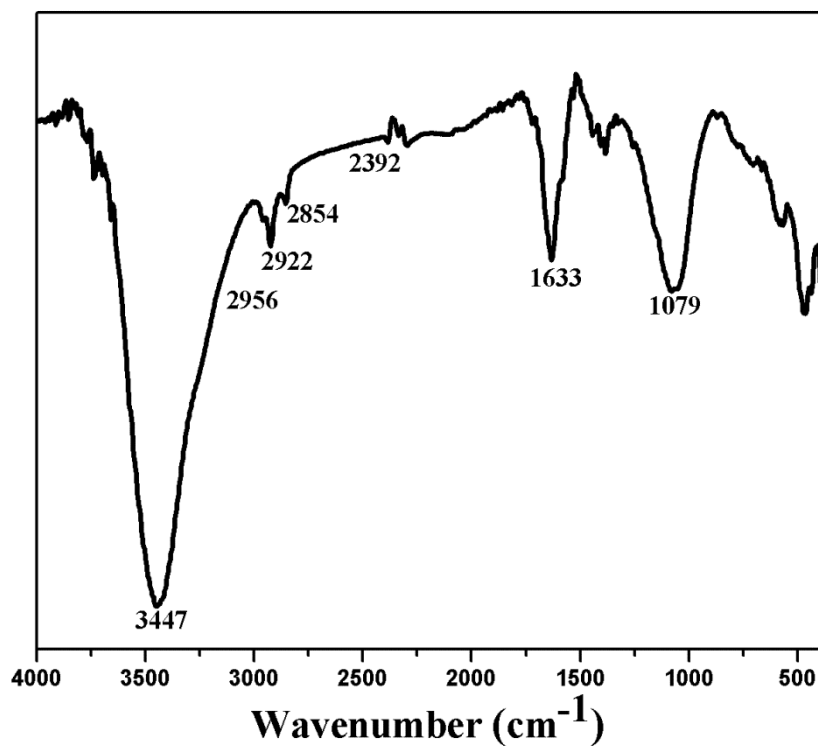

**Fig. S4.** FTIR spectrum of char residue of PLA4 after cone calorimeter test.

**Reference:**

1. Y. Bihe, B. Chenlu, Q. Xiaodong, S. Lei, T. Qilong, L. Kim Meow and H. Yuan, *Carbon*, 2014, **75**, 178.
2. L. F. Wang, D. Q. He, W. Chen and H. Q. Yu, *Water Res.*, 2015, **81**, 325.
3. W. Liu, D.-Q. Chen, Y.-Z. Wang, D.-Y. Wang and M.-H. Qu, *Polym. Degrad. Stabil.*, 2007, **92**, 1046.
4. M. Bugajny, S. Bourbigot, M. Le Bras and R. Delobel, *Poly. Int.*, 1999, **48**, 264.
